# Supplementary material for: Surface-decorated porphyrinic zirconium-based metal–organic frameworks (MOFs) using post-synthetic self-assembly for photodegradation of methyl orange dye
Source: Royal Society of Chemistry journal article supplement (doi:10.1039/d3ra02656f), 2023-01-01
Supplement: d3ra02656f1.pdf [file d3ra02656f1.pdf]

*Revised Supplementary Information*

**Surface-decorated porphyrinic zirconium-based metal-organic frameworks (MOFs) using post-synthetic self-assembly for photodegradation of methyl orange dye**

**Ahmed M. Kobaisy<sup>a</sup>, Marwa F. Elkady<sup>b</sup>, Ahmed A. Abdel-Moneim<sup>a</sup>, Mohamed E. El-Khouly<sup>a\*</sup>**

<sup>a</sup> Nanoscience Program, Institute of Basic and Applied Science, Egypt-Japan University of Science and Technology (E-JUST), New Borg El-Arab City, Alexandria, Egypt

<sup>b</sup> Chemical and Petrochemicals Engineering Department, Egypt-Japan University of Science and Technology (E-JUST), Egypt

**Corresponding:** Prof. Mohamed E. El-Khouly ([mohamed.elkhouly@ejust.edu.eg](mailto:mohamed.elkhouly@ejust.edu.eg))

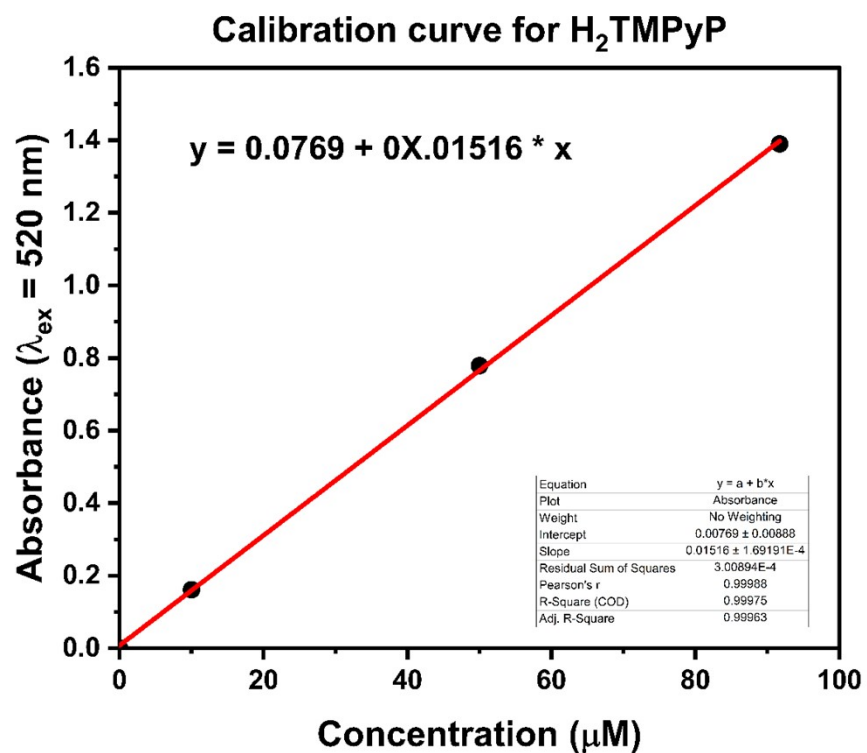

**Fig. S1** Calibration curve for different concentrations of H<sub>2</sub>TMPyP at 520 nm in an aqueous medium.

Quantitation method : Cliff Lorimer thin ratio section.  
Processing option : All elements analyzed (Normalised)  
Number of iterations = 1

Standardless

| Elem... | Weight% | Atomic% |
|---------|---------|---------|
| C K     | 38.07   | 74.50   |
| O K     | 7.87    | 11.56   |
| S K     | 0.02    | 0.02    |
| Zr K    | 54.03   | 13.92   |

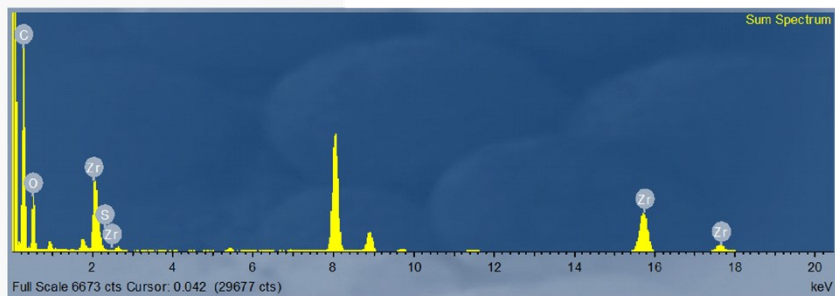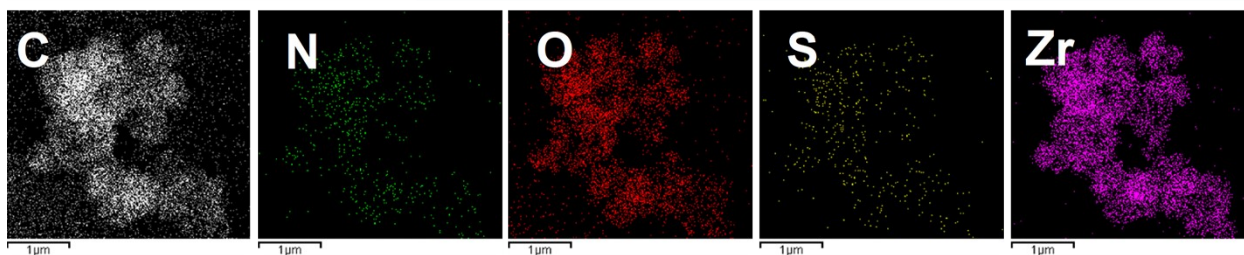

Fig. S2 TEM-EDS spectra and elemental mapping for H<sub>2</sub>TMPyP@UiO-66-NH<sub>2</sub>

Quantitation method : Cliff Lorimer thin ratio section.  
Processing option : All elements analyzed (Normalised)  
Number of iterations = 1

Standardless

| Elem... | Weight% | Atomic% |
|---------|---------|---------|
| C K     | 67.90   | 89.95   |
| O K     | 5.40    | 5.37    |
| S K     | 0.08    | 0.04    |
| Zr K    | 26.62   | 4.64    |
| Totals  | 100.00  |         |

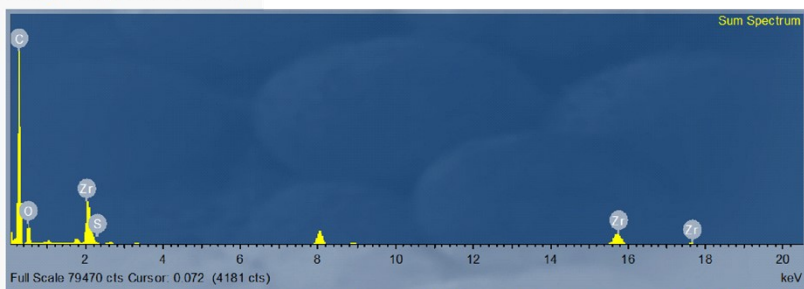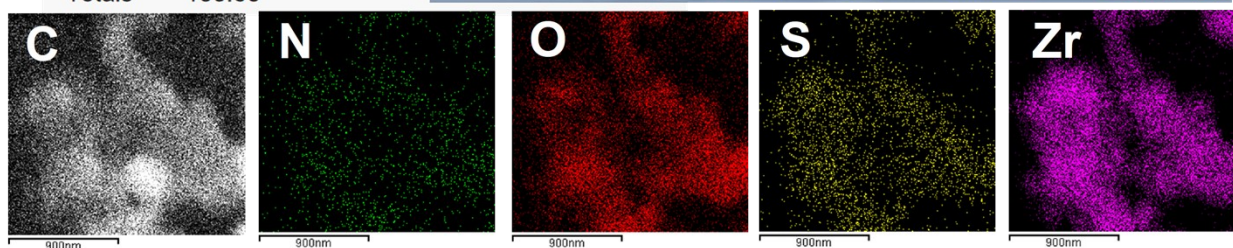

**Fig S3** TEM-EDS spectra and elemental mapping for H<sub>2</sub>TMPyP@UiO-66.

Spectrum processing :  
Peaks possibly omitted : 0.940, 2.840, 3.689, 8.037, 8.906, 9.705 keV

Quantitation method : Cliff Lorimer thin ratio section.  
Processing option : All elements analyzed (Normalised)  
Number of iterations = 1

Standardless

| Elem... | Weight% | Atomic% |
|---------|---------|---------|
| C K     | 55.86   | 81.23   |
| O K     | 11.41   | 12.46   |
| S K     | 0.13    | 0.07    |
| Zr K    | 32.59   | 6.24    |

Totals 100.00

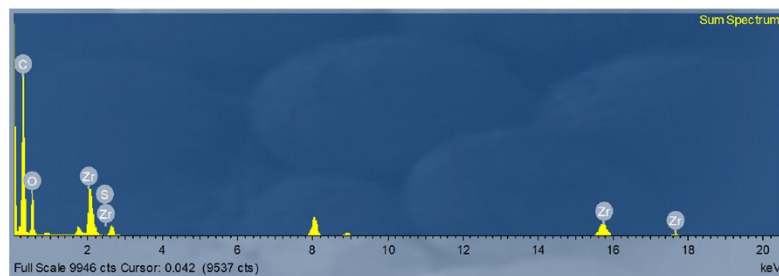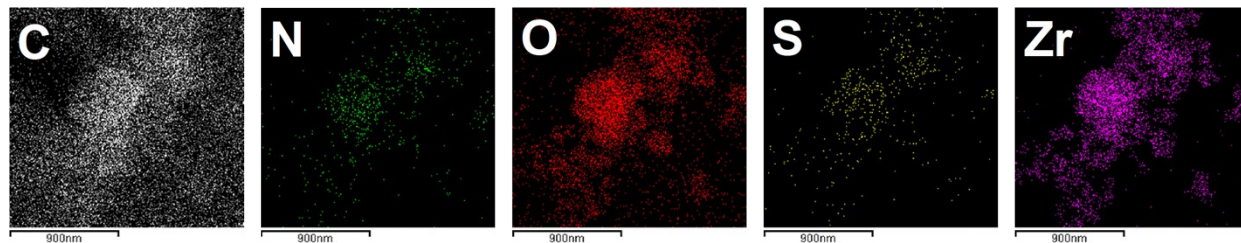

**Fig. S4** TEM-EDS spectra and elemental mapping for H<sub>2</sub>TMPyP@MIP-202.

Quantitation method : Cliff Lorimer thin ratio section.  
Processing option : All elements analyzed (Normalised)  
Number of iterations = 1

Standardless

| Elem... | Weight% | Atomic% |
|---------|---------|---------|
| C K     | 36.83   | 69.16   |
| O K     | 13.09   | 18.45   |
| Zr K    | 50.08   | 12.38   |
| Totals  | 100.00  |         |

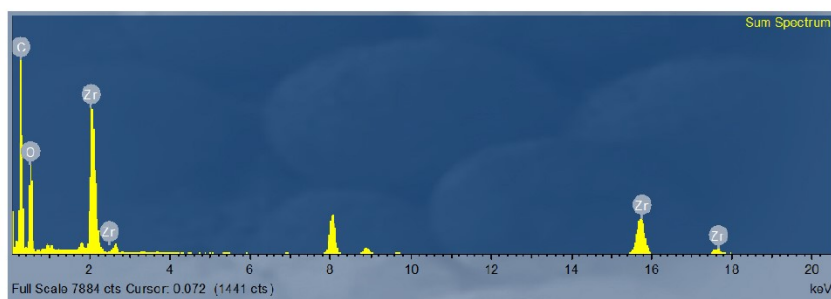

**Fig. S5** TEM-EDS spectra for UiO-66-NH<sub>2</sub>

Quantitation method : Cliff Lorimer thin ratio section.  
Processing option : All elements analyzed (Normalised)  
Number of iterations = 1

Standardless

| Elem... | Weight% | Atomic% |
|---------|---------|---------|
| C K     | 61.07   | 86.64   |
| O K     | 6.93    | 7.38    |
| Zr K    | 31.99   | 5.98    |

Totals 100.00

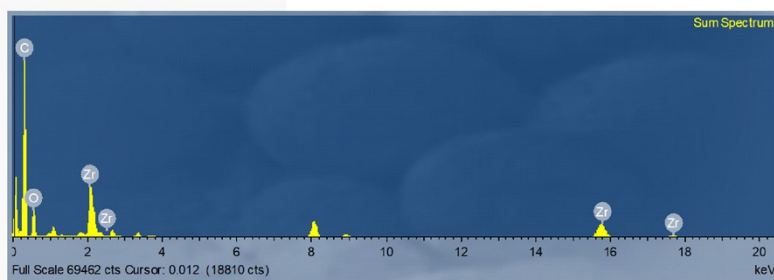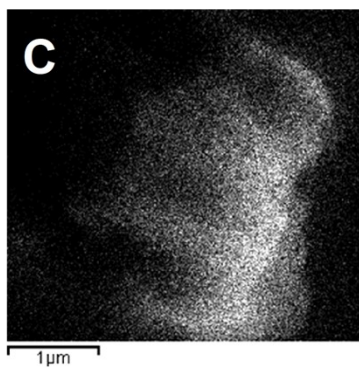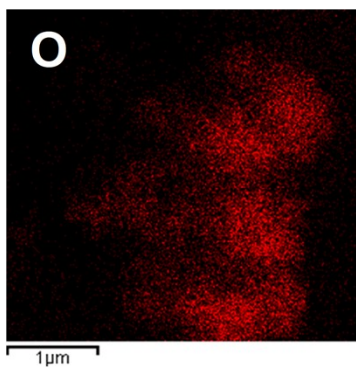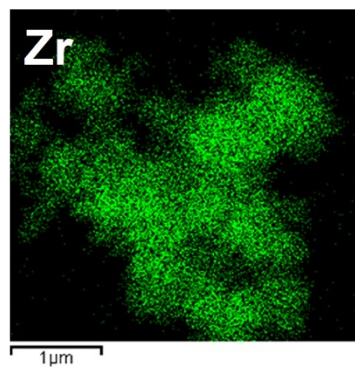

Fig. S6 TEM-EDS spectra for UiO-66.

Spectrum processing :  
Peaks possibly omitted : 0.926, 2.831, 8.035, 8.899, 9.679 keV

Quantitation method : Cliff Lorimer thin ratio section.  
Processing option : All elements analyzed (Normalised)  
Number of iterations = 1

Standardless

| Elem... | Weight% | Atomic% |
|---------|---------|---------|
| C K     | 61.81   | 85.52   |
| O K     | 8.78    | 9.12    |
| Zr K    | 29.40   | 5.36    |

Totals 100.00

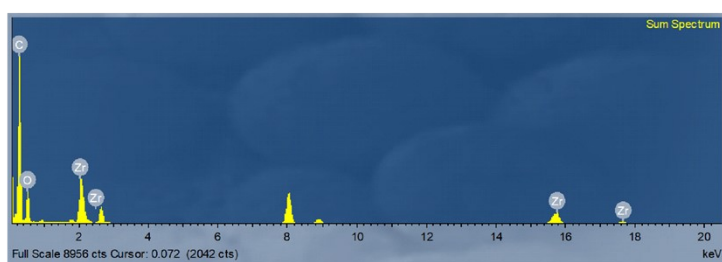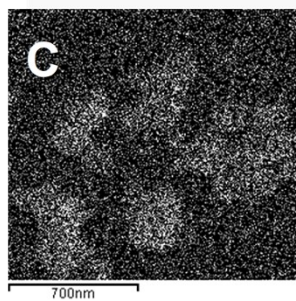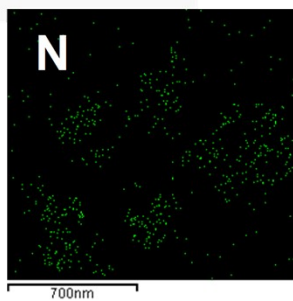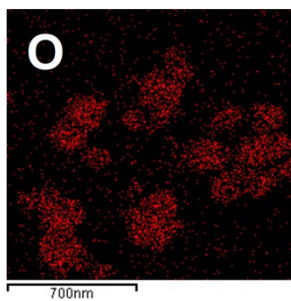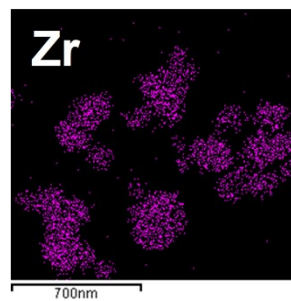

Fig. S7 TEM-EDS spectra for MIP-202.



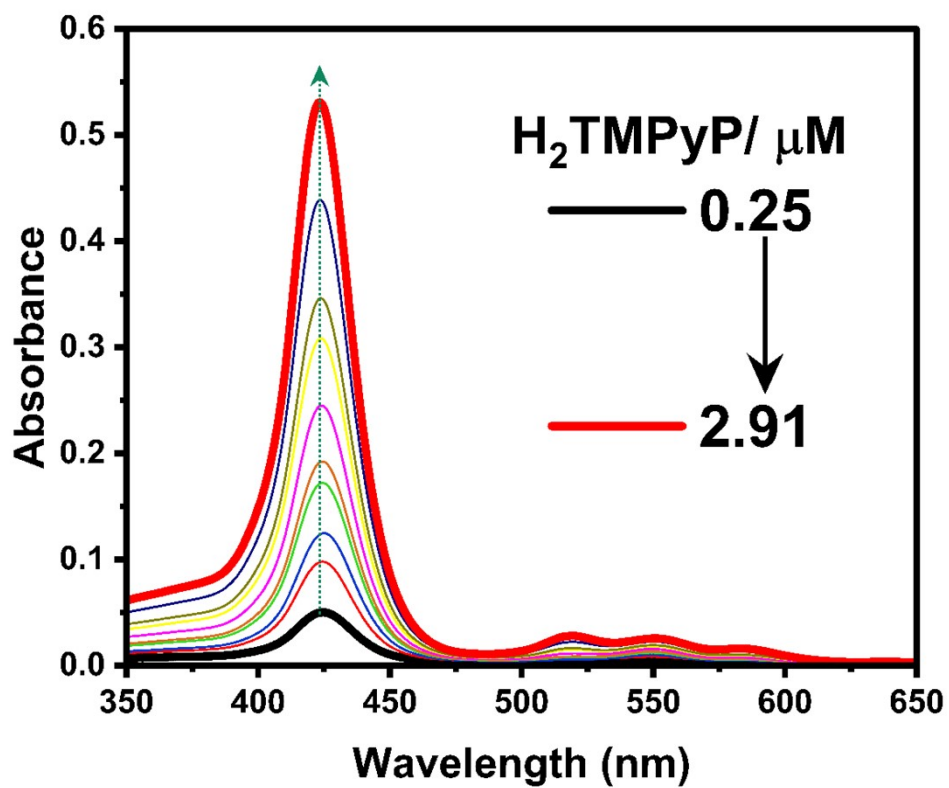

Fig. S8 Steady-state absorption spectra of different concentrations of H<sub>2</sub>TMPyP.

(a)

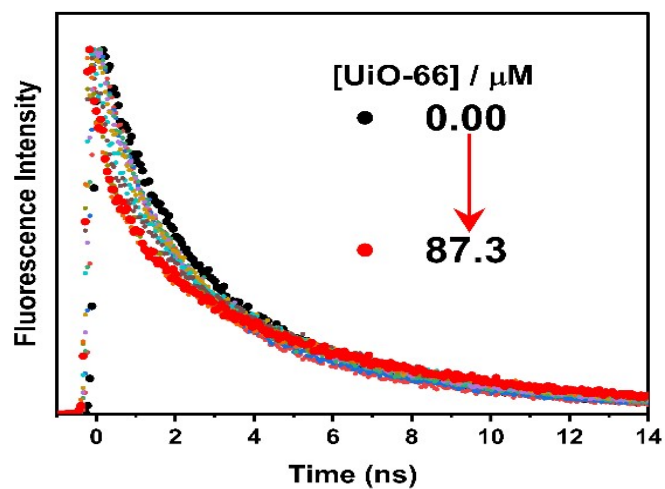

(b)

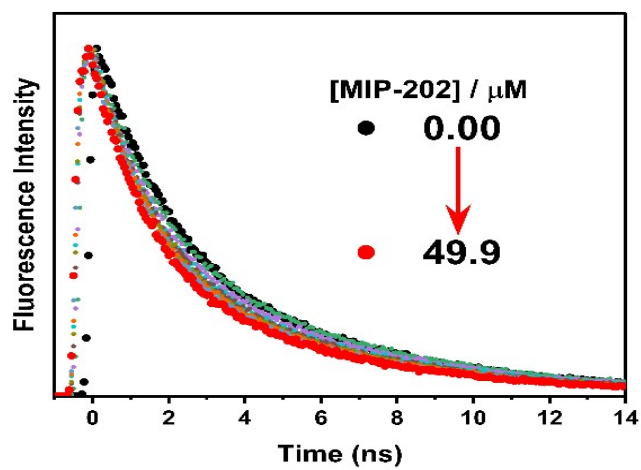

**Fig. S9** TCSPC decay profiles for titration of H<sub>2</sub>TMPyP (3.0  $\mu\text{M}$ ) with (a) UiO-66-NH<sub>2</sub> (0-87.3  $\mu\text{M}$ ), and (b) MIP-202 (0-49.9  $\mu\text{M}$ ). The excitation light was fixed at 439 nm.

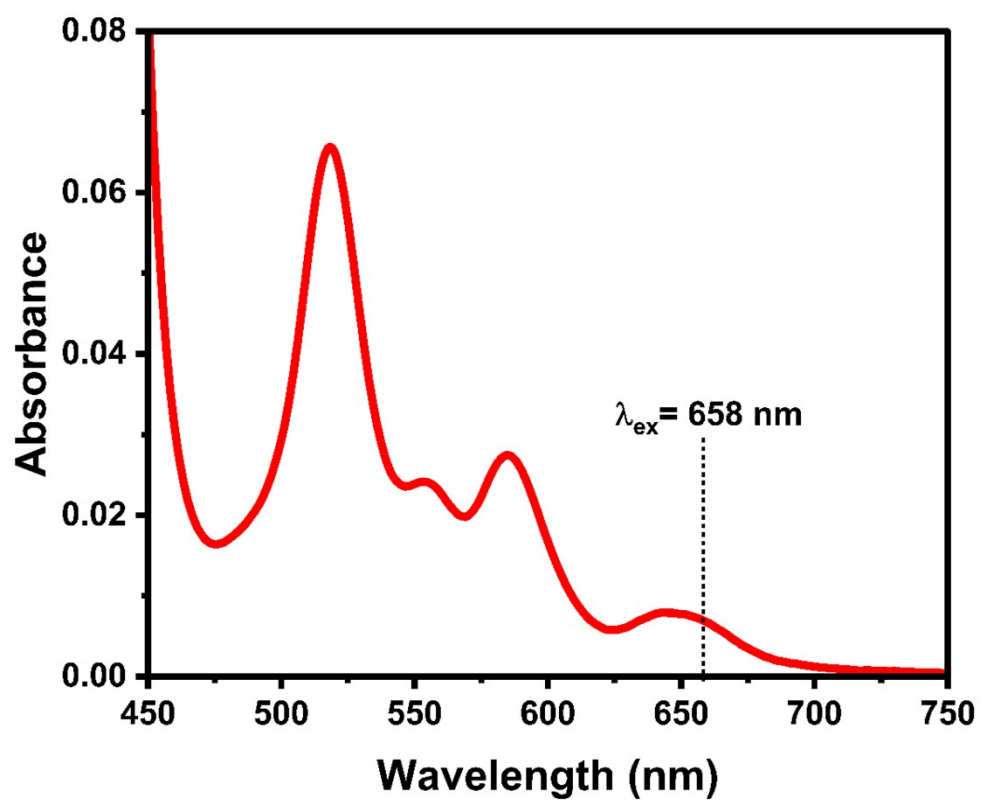

Fig. S10 Q-band of H<sub>2</sub>TMPyP.
